# Supplementary material for: Visible light-driven H2O2 synthesis over Au/C3N4: medium-sized Au nanoparticles exhibiting suitable built-in electric fields and inhibiting reverse H2O2 decomposition
Source: Royal Society of Chemistry journal article supplement (doi:10.1039/d2cp04202a), 2022-01-01
Supplement: d2cp04202a1.pdf [file d2cp04202a1.pdf]

### Electrochemical measurements details

An aqueous solution of 0.5 M Na<sub>2</sub>SO<sub>4</sub> was used as an electrolyte and the working electrode was prepared as below: 5 mg of photocatalyst was dispersed in 1 mL of ethanolic solution contained Nafion (3 v/v%) and then sonicated for 30 min to give a homogenous suspension. Then, the mixed solution was dropped on 2.5 × 2.5 cm FTO (Fluorine doped tin oxide) substrate by spin coating technique and left under the air to be dried. All electrochemical measurements were conducted under visible light irradiation provided by a 300 W Xe lamp along with a 400 nm cutoff filter. The electrochemical impedance spectra (EIS) were done at the amplitude of 5 mV and frequency ranges of 0.1-105 Hz. The acquired results vs Ag/AgCl were converted to RHE (reversible hydrogen electrode) according to Equations (1) [1]

$$E_{\text{RHE}} = E_{\text{AgCl}} + E^0_{\text{AgCl}} \quad (1)$$

Table S1. Values used for the entropy and zero-point energy corrections in determining the free energy of reactants, products and intermediate species adsorbed on catalysts.

| Species             | Pressure/bar | Temperature/K | E(DFT)/eV | $\Delta G$ (eV) | G (eV) |
|---------------------|--------------|---------------|-----------|-----------------|--------|
| H <sub>2</sub> (g)  | 1            | 298.15        |           |                 | -9.91  |
| O <sub>2</sub> (g)  | 1            | 298.15        | -6.78     | -0.022          | -6.80  |
| H <sub>2</sub> O(l) | 0.035        | 298.15        | -14.20    | -0.024          | -14.22 |

Table S2. Adsorption free energies of \*OH, \*O, and \*OOH on different active sites over catalysts.

| atalysts Species             | *O   | *OH  | *OOH |
|------------------------------|------|------|------|
| Au/CN-150 (Au <sub>4</sub> ) | 2.82 | 1.56 | 3.71 |
| Au/CN-100(Au <sub>8</sub> )  | 1.67 | 1.39 | 4.49 |
| Au/CN-50(Au <sub>12</sub> )  | 2.27 | 0.86 | 4.22 |

Table S3. Reaction free energy (vs. RHE) of elementary step for 4e- transfer ORR at  $U_{\text{RHE}} = 0$  V on different catalysts.

| Catalysts                     | $\Delta G_1$ (eV) | $\Delta G_2$ (eV) | $\Delta G_3$ (eV) | $\Delta G_4$ (eV) |
|-------------------------------|-------------------|-------------------|-------------------|-------------------|
| Au/CN-150 ( $\text{Au}_4$ )   | -1.21             | -0.89             | -1.26             | -1.56             |
| Au/CN-100 ( $\text{Au}_8$ )   | -0.43             | -2.82             | -0.28             | -1.39             |
| Au/CN-50 ( $\text{Au}_{12}$ ) | -0.7              | -1.95             | -1.41             | -0.86             |

Table S4. Reaction free energy (vs. RHE) of elementary step for 2e- transfer ORR at  $U_{\text{RHE}} = 0$  V on different catalysts.

| Catalysts                     | $\Delta G_5$ (eV) | $\Delta G_6$ (eV) |
|-------------------------------|-------------------|-------------------|
| Au/CN-150 ( $\text{Au}_4$ )   | -1.21             | -0.19             |
| Au/CN-100 ( $\text{Au}_8$ )   | -0.43             | -0.97             |
| Au/CN-50 ( $\text{Au}_{12}$ ) | -0.80             | -0.60             |

Table S5. Reaction free energy for potential determining step at equilibrium potential ( $\Delta G_{\text{max}}$ ) for ORR, reaction free energy of potential determining step for 4e- ORR ( $\Delta G_{\text{H}_2\text{O}}$ ). reaction free energy of potential determining step for 2e- ORR ( $\Delta G_{\text{H}_2\text{O}_2}$ ).

| Catalysts                     | $\Delta G_{\text{H}_2\text{O}}$ (eV) | $\Delta G_{\text{H}_2\text{O}_2}$ (eV) | $\Delta G_{\text{H}_2\text{O}} - \Delta G_{\text{H}_2\text{O}_2}$ (eV) |
|-------------------------------|--------------------------------------|----------------------------------------|------------------------------------------------------------------------|
| Au/CN-150 ( $\text{Au}_4$ )   | -0.89                                | -0.19                                  | -0.70                                                                  |
| Au/CN-100 ( $\text{Au}_8$ )   | -0.28                                | -0.43                                  | 0.15                                                                   |
| Au/CN-50 ( $\text{Au}_{12}$ ) | -0.70                                | -0.60                                  | -0.10                                                                  |

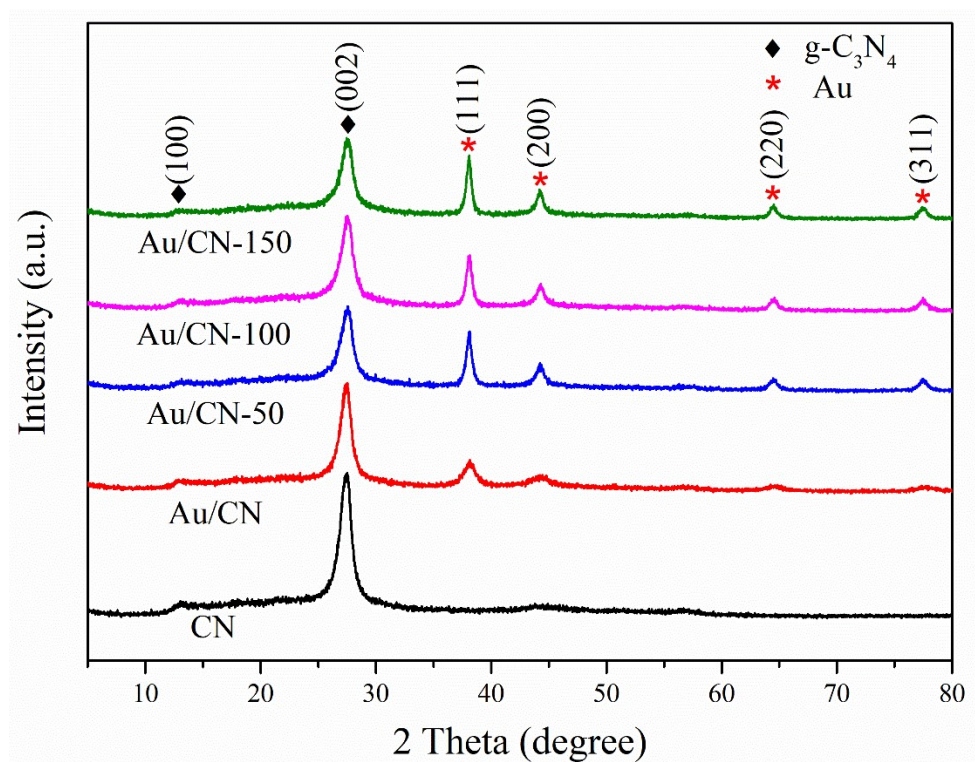

Figure S1. XRD pattern of different samples.

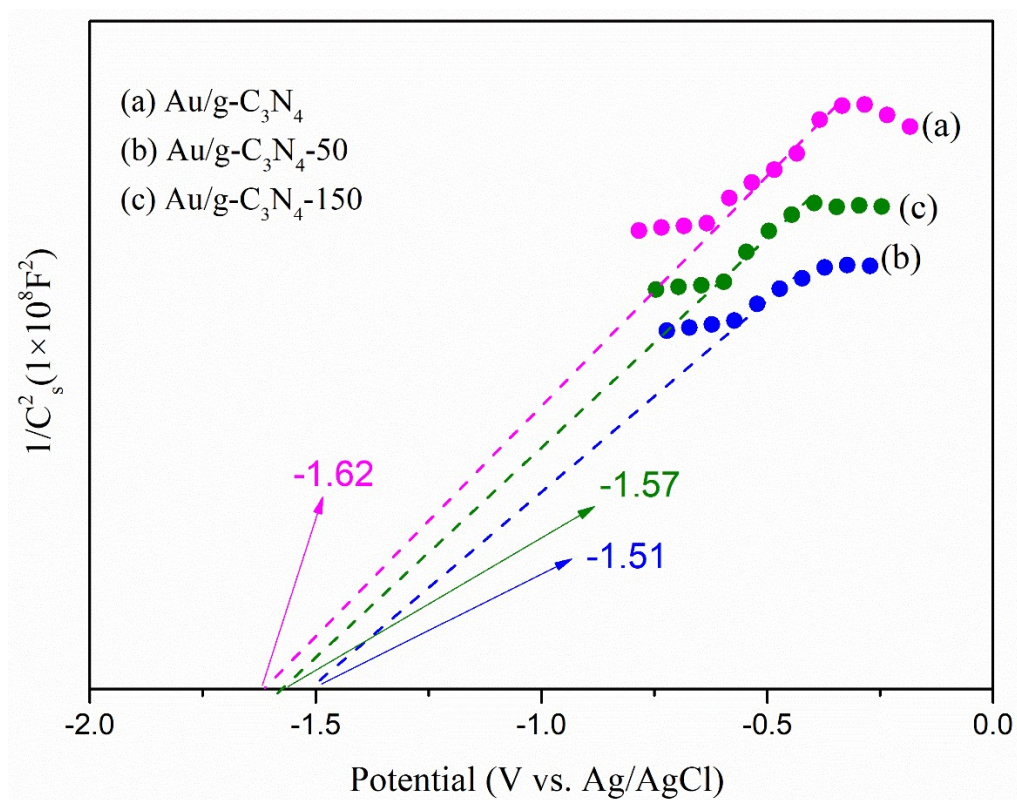

Figure S2. Mott-Schottky plot of Au/CN, Au/CN-50 and Au/CN-150



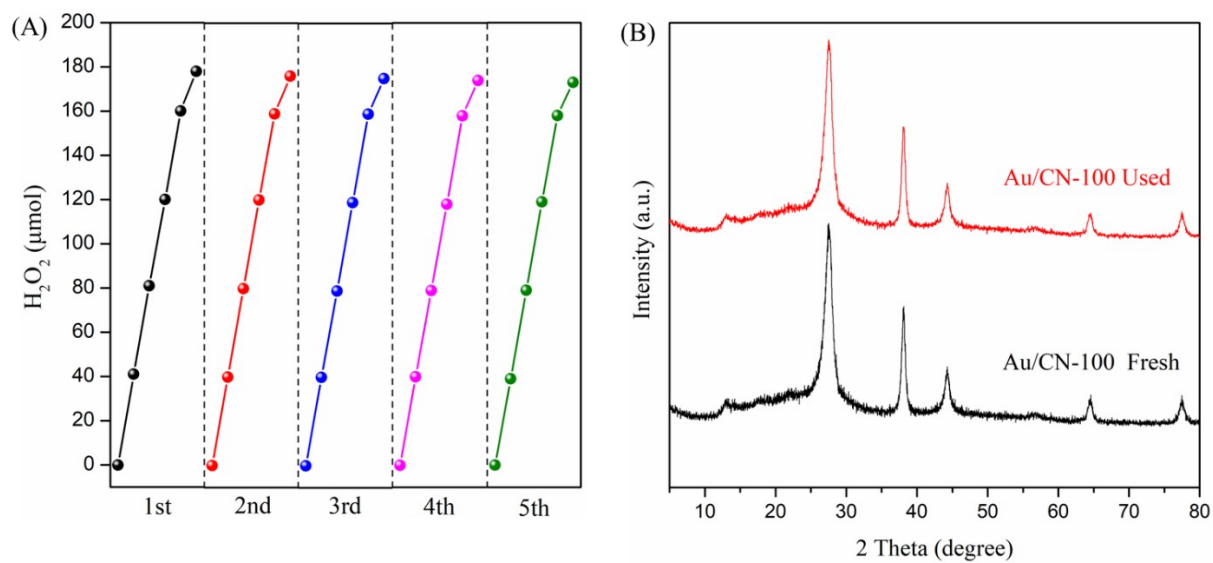

Figure S3. (A) Reusability of Au/CN-100 in the production of  $H_2O_2$ ; (B) XRD patterns of Au/CN-100 photocatalytic reaction before and after.

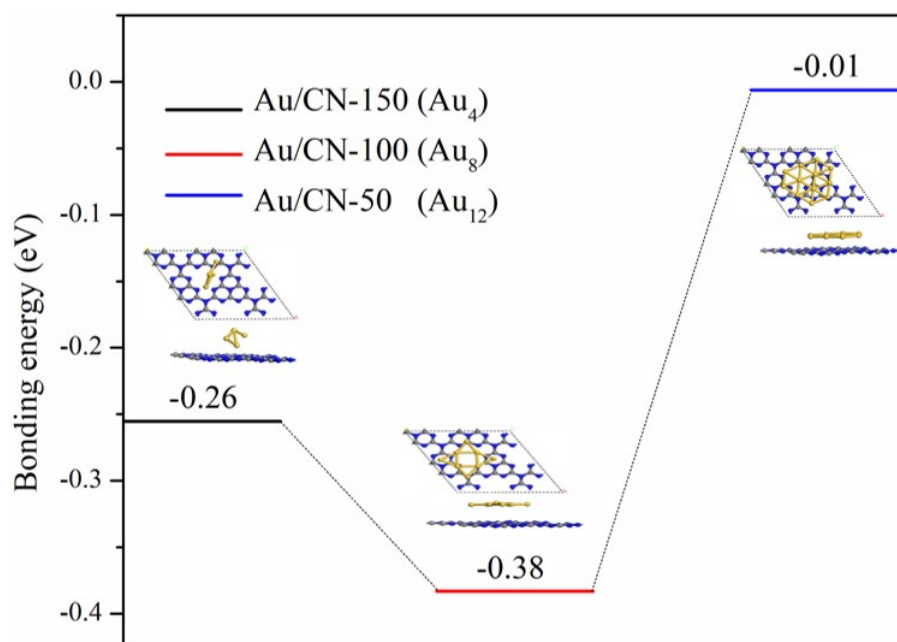

Figure S4. Optimized structures and the free energies of CN combine with  $\text{Au}_4$ ,  $\text{Au}_8$  and  $\text{Au}_{12}$ .

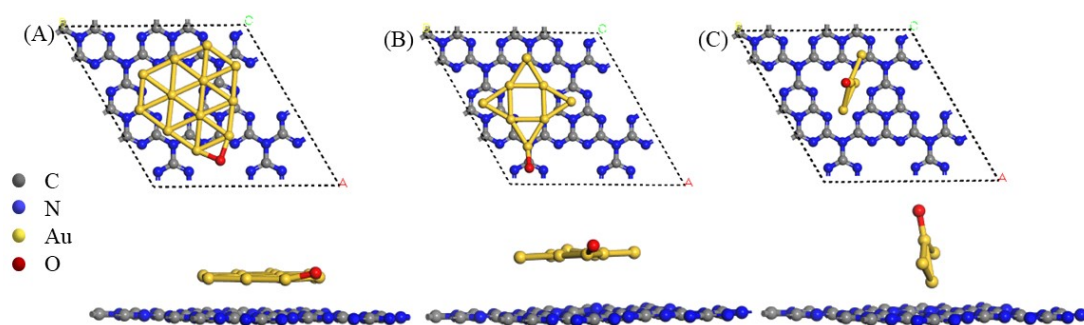

Figure S5. Top and side views of the optimized  $*O$  adsorption stability model for (A) Au/CN-50(Au<sub>12</sub>), (B) Au/CN-100(Au<sub>8</sub>), (C) Au/CN-150(Au<sub>4</sub>) structures

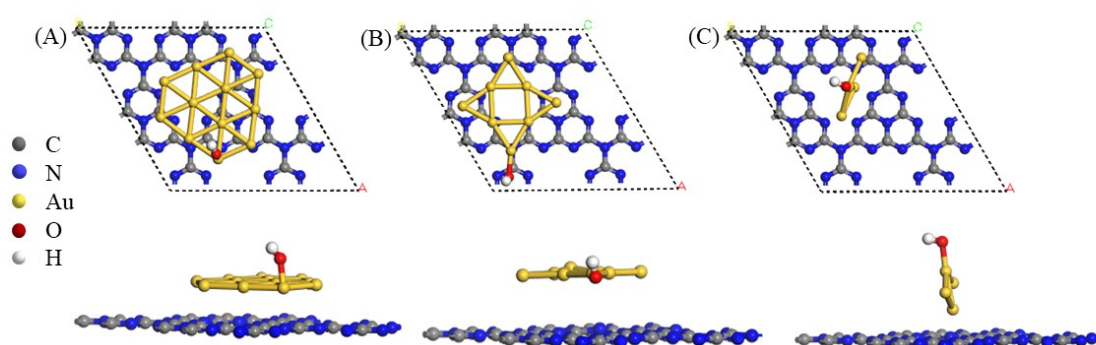

Figure S6. Top and side views of the optimized  $^*\text{OH}$  adsorption stability model for (A) Au/CN-50( $\text{Au}_{12}$ ), (B) Au/CN-100( $\text{Au}_8$ ), (C) Au/CN-150( $\text{Au}_4$ ) structures

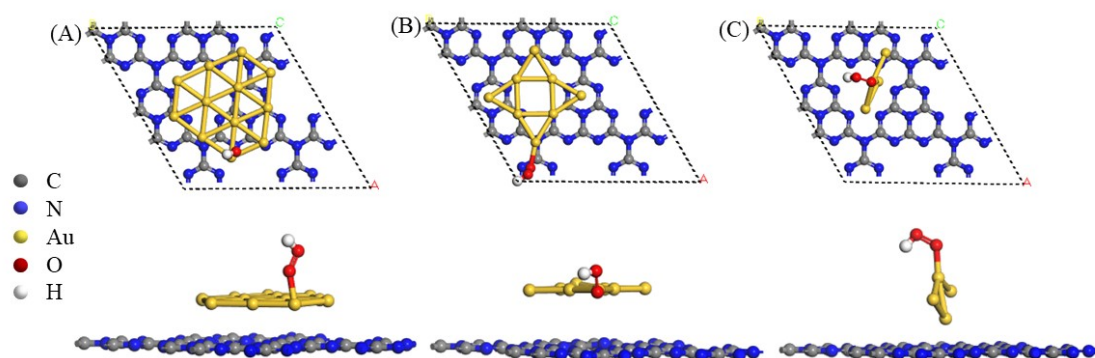

Figure S7. Top and side views of the optimized  $\cdot\text{OOH}$  adsorption stability model for (A) Au/CN-50( $\text{Au}_{12}$ ), (B) Au/CN-100( $\text{Au}_8$ ), (C) Au/CN-150( $\text{Au}_4$ ) structures

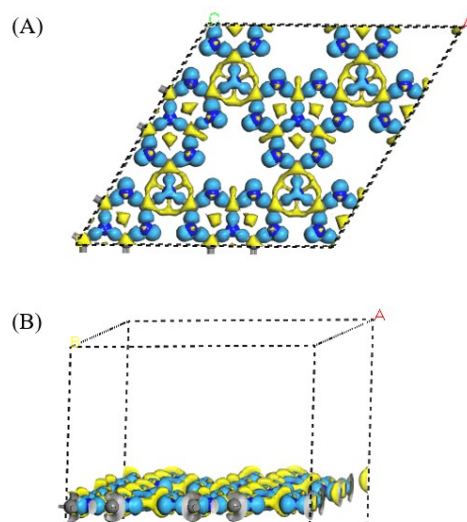

Figure S8. Charge density difference of Au/CN-100 Top(A) and side(B)

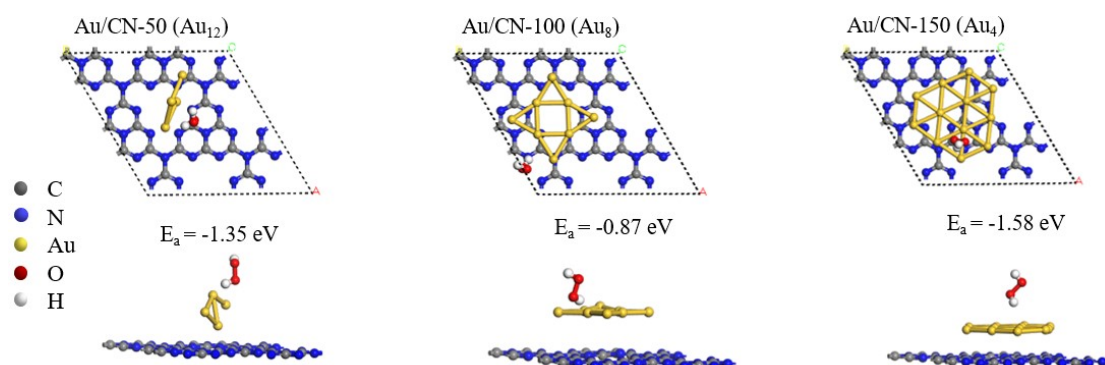

Figure S9. Top and side views of the optimized  $\text{H}_2\text{O}_2$  adsorption structures

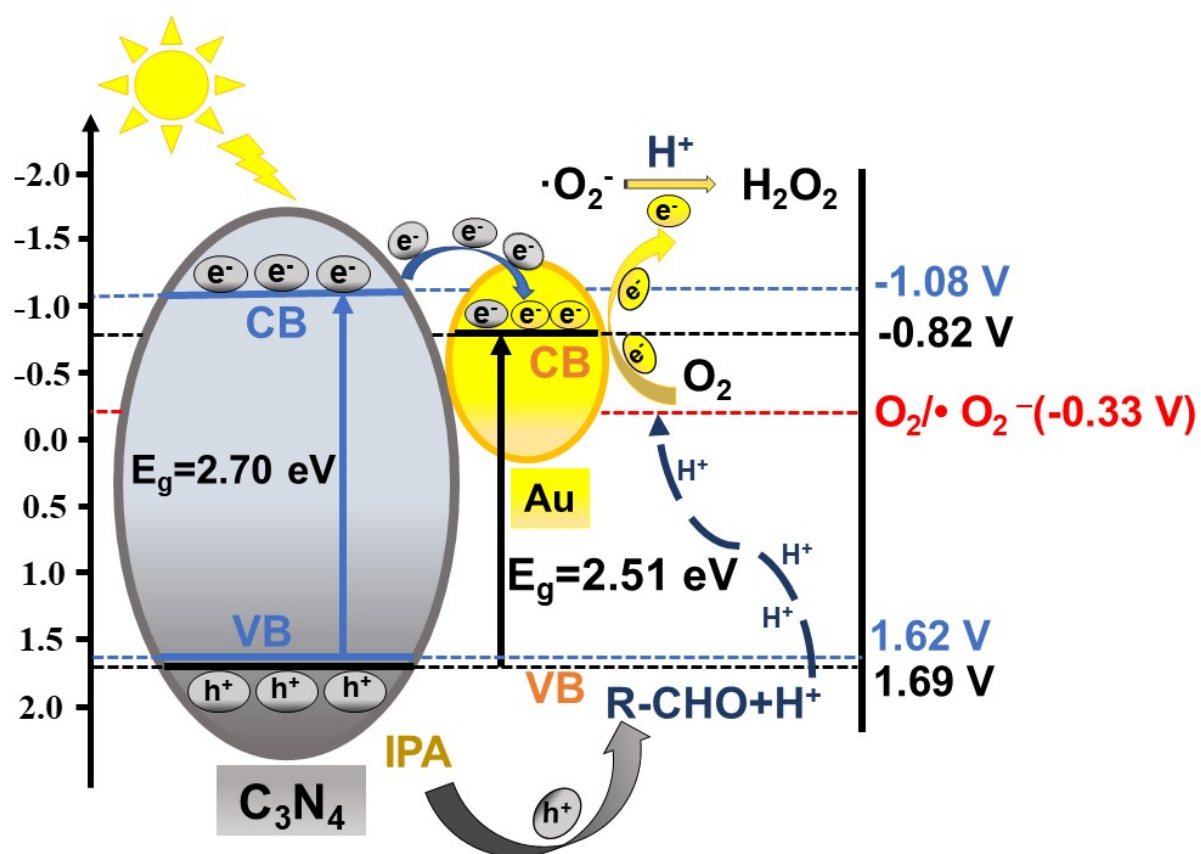

Figure S10. Reaction mechanism on Au/CN-100



- 
- [1] Tang, R.; Gong, D.; Zhou, Y.; Deng, Y.; Feng, C.; Xiong, S.; Huang, Y.; Peng, G.; Li, L.; Zhou, Z., Unique g-C<sub>3</sub>N<sub>4</sub>/PDI-g-C<sub>3</sub>N<sub>4</sub> homojunction with synergistic piezo-photocatalytic effect for aquatic contaminant control and H<sub>2</sub>O<sub>2</sub> generation under visible light. *Appl. Catal. B: Environ.* 2022, 303, 120929.
